# Supplementary material
Source: publisher site journal article supplement (http://www.degruyter.com/publication/journal_key/ARCA/downloadAsset/ARCA_Call_for_Papers.pdf)
Supplement: Supplementary file 1 [file ARCA_Call_for_Papers.pdf]

# ARCADIA

International Journal of Literary Culture  
Internationale Zeitschrift für literarische Kultur

*Ed. by Vladimir Biti & Vivian Liska*

*Founded by Horst Rüdiger*

## Call for Papers

For the upcoming issue of *arcadia* the editors cordially invite contributions: articles and book reviews.

### Aims and Scope:

*arcadia* is a biannual peer-reviewed international, intercultural and interdisciplinary journal that welcomes reflexive and informed comparative and critical approaches to literary works, films, theatre plays, to social, political, cultural, visual and media phenomena, to translations, literary and cultural migrations and transfers as well as to theoretical, methodological and philosophical questions. It publishes contributions in German, English, and French from all over the world and keeps its pages open to a broad variety of theories and methods. It fosters innovation, recontextualization and reconceptualization derived from a confrontation between different, and often asymmetric, national, cultural, gendered, economic, geopolitical, intellectual, disciplinary and institutional settings.

Next to the proposals for thematic clusters and special issues, the journal also invites independent articles by both eminent and emerging scholars. After an initial editorial screening, submissions undergo a blind review process by an international advisory board and other experts in the field.

### Editorial Board:

Shang Biwu (Shanghai), Lucia Boldrini (London), David Damrosch (Cambridge, MA), César Domínguez (Santiago de Compostela), Angela Esterhammer (Toronto), Monika Fludernik (Freiburg), Massimo Fusillo (L'Aquila), Isabel Gil (Lisbon), Walid Hamarneh (Richmond, VA), Margaret Higonnet (Storrs, CT), Marko Juvan (Ljubljana), Renate Lachmann (Konstanz), Geert Lernout (Antwerpen), Sowon Park (St. Barbara), Robert Stockhammer (Munich), Galin Tihanov (London), Wang Ning (Beijing)

**Submissions** prepared in Word format and MLA Referencing Style should be sent to the editorial office of *arcadia*, Ivana Perica (ivana.perica@univie.ac.at). The *arcadia* Style Sheet is available at <http://www.degruyter.com/view/j/arca>. Submitted papers should contain between 20 000 and 60 000 characters. They should not be submitted elsewhere, should not constitute chapters of finished or nearly finished dissertations, and should not have been published in another major language. Articles may be written in German, English, and French. Authors whose articles are not in their native language are strongly advised to have their manuscript checked by a native speaker. Stylistically and grammatically incorrect articles will not be considered.

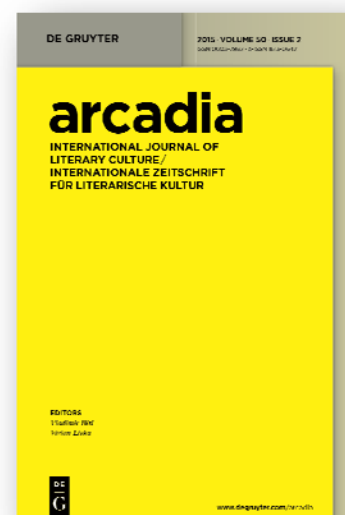

**ISSN 0003-7982**  
**e-ISSN 1613-0642**

### SUBSCRIPTION RATES FOR 2015

**Print:**  
€ [D] 198.00 / \*US\$ 298.00 / GBP 149.00

**Online:**  
Individuals  
€ [D] 49.00 / \*US\$ 74.00 / GBP 37.00  
Institutions  
€ [D] 198.00 / \*US\$ 298.00 / GBP 149.00

**Print + Online:**  
€ [D] 238.00 / \*US\$ 357.00 /  
GBP 179.00

**Single Issue (Print):**  
€ [D] 109.00 / \*US\$ 164.00 / \*GBP 82.00

2 Issues per year

**Language of Publication:**  
English, German, French

**Subjects:**  
Comparative Literary Studies  
Literary Studies, general

SCImago Journal Rank (SJR) 2014: 0.116

**arcadia** is covered by the following services:

Celdes, CNKI Scholar (China National Knowledge Infrastructure), CNPIEC, De Gruyter – Germanistik, De Gruyter – IBR (International Bibliography of Reviews of Scholarly Literature in the Humanities and Social Sciences), De Gruyter – IBZ (International Bibliography of Periodical Literature in the Humanities and Social Sciences), EBSCO – Humanities International Complete/Humanities Source, EBSCO – Literary Reference Center Plus, EBSCO – TOC Premier, Elsevier – SCOPUS, ERIH PLUS (European Reference Index for the Humanities and Social Sciences), Google Scholar, J-Gate, JournalTOCs, L'Année philologique, MLA International Bibliography, Primo Central (ExLibris), ProQuest – Deep Indexing: Technical Information, ProQuest – Illustrata: Arts and Humanities, ProQuest – Illustrata: Natural Sciences, ReadCube, ResearchGate, SCImago (SJR), TDOne (TDNet), Thomson Reuters – Arts & Humanities Citation Index, Thomson Reuters – Current Contents/Arts & Humanities, UB Frankfurt – BDSL Bibliographie der deutschen Sprach- und Literaturwissenschaft, UB Frankfurt – OLC Germanistik, UB Frankfurt – OLC Komparatistik, Ulrich's Periodicals Directory/ulrichsweb, World Cat (OCLC)
